# Supplementary material for: Effects of 10-min of pre-warming on inadvertent perioperative hypothermia in intraoperative warming patients: a randomized controlled trial
Source: PubMed Central journal article supplement — Anesth Pain Med (Seoul). 2020 Jul 31;15(3):356–64. doi: 10.17085/apm.20027 (PMC7713844; doi:10.17085/apm.20027), 2020-07-31
Supplement: apm-20027-supplementary.pdf [file apm-20027-supplementary.pdf]

## 수술 전 10분의 가온이 수술 중 지속적인 가온을 시행 받는 환자의 주술기 저체온 예방에 미치는 효과: 무작위 대조 시험

유재화, 옥시영, 김상호, 정지원, 박선영, 김문규, 조호범, 유규완

순천향대학교 의과대학 서울병원 마취통증의학교실

## Effects of 10-minutes of pre-warming on inadvertent perioperative hypothermia in intraoperative warming patients: a randomized controlled trial

Jae Hwa Yoo, Si Young Ok, Sang Ho Kim, Ji Won Chung, Sun Young Park, Mun Gyu Kim, Ho Bum Cho, and Gyu Wan You

Department of Anesthesiology and Pain Medicine, Soonchunhyang University Seoul Hospital, Soonchunhyang University College of Medicine, Seoul, Korea

Received April 6, 2020  
Revised May 21, 2020  
Accepted June 2, 2020

### Corresponding author

Jae Hwa Yoo, M.D.  
Department of Anesthesiology and Pain Medicine, Soonchunhyang University Seoul Hospital, 59 Daesagwan-ro, Yongsan-gu, Seoul 04401, Korea  
Tel: 82-2-709-9302  
Fax: 82-2-790-0394  
E-mail: lenael5719@gmail.com

This study was presented in the 2018 95th Annual Scientific Meeting of The Korean Society of Anesthesiologists, Seoul, Korea.

**Background:** This study aimed to evaluate the efficacy of 10-min pre-warming in preventing inadvertent perioperative hypothermia, which is defined as a reduction in body temperature to less than 36.0°C during the perioperative period in intraoperative warming patients.

**Methods:** In this prospective randomized study, 60 patients scheduled for elective surgery under general anesthesia lasting less than 120 min were divided into two groups: the 10-min pre-warming group (n = 30) and the control group (n = 30). Patients in the 10-min pre-warming group were pre-warmed for 10 min in the pre-anesthetic area using a forced-air warmer set at 47°C. Intraoperatively, we warmed all patients with a forced-air warmer. Body temperature was measured using a tympanic membrane thermometer pre- or postoperatively and a nasopharyngeal temperature probe intraoperatively. Patients were evaluated on the shivering and thermal comfort scale in the pre-anesthetic area and post-anesthesia care unit.

**Results:** The incidences of intraoperative hypothermia and postoperative hypothermia were similar in both groups (10.7% vs. 28.6%, P = 0.177; 10.7% vs. 10.7%, P = 1.000 respectively). Body temperature was higher in the 10-min pre-warming group (P = 0.003). Thermal comfort during the pre-warming period was higher in the 10-min pre-warming group (P < 0.001). However, postoperative thermal comfort and shivering grades of both groups were similar.

**Conclusions:** Ten minutes of pre-warming has no additional effect on the prevention of inadvertent perioperative hypothermia in intraoperative warming patients.

**Keywords:** Brief; Forced-air warming; Hypothermia; Preoperative period.

## 서론

주 술기 저체온은 주 술기에 체온이 36°C 미만으로 감소하는 것으로 정의되며, 간단한 수술에서도 50-90%로 흔하게 나타나고, 여러 주 술기 합병증과 연관되어 있어 반드시 예방을 위한 노력이 필요하다[1-3]. 최근에는 이런 주 술기 저체온을 줄이기 위하여 다양한 방법의 수술 중 적극적인 가온이 시행되고 있으며, 이 중 강제적 공기 가온기는 간단하고 안전하며 효과적인 방법으로서 가장 흔하게 사용되고 있다[4]. 그러나 이런 수술 중 적극적인 가온에도 불구하고 수술 1시간 이내에 발생하는 저체온은 65% 정도에서 발생하고 있으며, 이를 예방하기 위한 추가의 방법이 필요하다[5].

수술 1시간 이내에 발생하는 주 술기 저체온은 마취 유도 직후부터 빠르게 발생하며, 수술 첫 시간에 중심부 체온이 1.6°C 감소되고, 마취제로 유도된 혈관이완으로 인해 중심-말초 체온 재분배로 인한 것이 이 중 81%를 차지하며 46 kcal의 열이 재분배된다고 알려져 있다[6]. 이런 재분배로 인한 주 술기 저체온은 수술 전 가온을 통해 말초 체온을 증가시켜 중심-말초 체온 차를 감소시킴으로써 예방 할 수 있다고 알려져 있으며[4,7], 여러 가이드라인에서 30분 이상의 수술 전 가온을 권고하고 있다[8,9]. 그러나 수술 전 대기 장소가 부족하거나 없는 임상 상황에서 가이드라인에서 권고하는 30분 이상의 수술 전 가온을 적용하기에는 어려움이 따른다.

최근에는 30분보다 짧은 수술 전 가온이 효과적이라는 여러 연구들이 보고되었다. Brauer 등[10]은 30분 이내의 정규적인 가온을 통해 효과적으로 주 술기 저체온을 감소시켰다고 보고하였으며, Horn 등[11]은 10분, 20분, 30분의 수술 전 가온 군과 대조 군을 비교한 연구에서 10분의 수술 전 가온도 주 술기 저체온을 효과적으로 감소시켰다고 보고하였다. 또한, 본 저자들의 10분과 30분의 수술 전 가온을 비교한 이전 연구에서도 10분의 수술 전 가온이 효과적이라는 결과를 얻었다[12]. 그러나 짧은 시간의 수술 전 가온에 관한 대부분의 연구들은 저체온이 발생한 경우에만 수술 중 가온을 적용하여 수술 중 지속적인 가온을 시행 받는 환자에서 효과의 효과를 확인할 수 없다. 더욱이 수술 중 지속적인 가온을 시행 받는 환자들에게 수술 전 가온에 대한 효과는 기존의 30분 이상의 수술 전 가온을 시행한 경우에도 아직 논란의 여지가 있다[13-16].

이에 본 저자들은 최근 효과적이라고 보고된 10분의 수술 전 가온이 수술 중 지속적인 가온을 시행 받는 환자들에게 추가적인 이득을 보이는지를 확인하기 위해 본 연구를 계획하였다.

## 대상 및 방법

이 연구는 전향적 무작위 연구로 본 기관의 연구 윤리 위원회 (no. SCHUH 2017-11-013-001)의 승인을 받고 한국임상연구정보서비스(cris.nih.go.kr, no. KCT 0002803)에 등록 후 2018년 4월 19일부터 2018년 5월 11일까지 진행되었다. 모든

환자들은 수술 전일 방문을 통해 연구에 관한 충분한 설명을 듣고 동의를 받고 연구가 시행되었다.

## 대상

본 연구는 19세 이상의 미국마취과학회 신체등급 분류 1-3에 해당되고, 120분 이내의 정규 수술이 예정된 환자들을 대상으로 하였다. 제외 기준은 다음과 같다: 체질량지수(body mass index) 35 kg/m<sup>2</sup> 이상인 경우; 수술 전 체온이 38°C 이상이거나 36°C 이하인 경우; 부위마취를 시행하거나, 부위마취와 전신마취를 병행하는 경우; 임신부인 경우.

## 무작위 배정과 맹검

환자들은 수술 전일 선별 후 엑셀(Microsoft Excel 2016; block size 4, 6)을 이용한 1:1 비율의 블록배정 무작위 번호를 통해 10분 수술 전 가온 군(10-min pre-warming group; n = 30)과 대조 군(Control group; n = 30) 두 군으로 무작위 배정이 되었다. 블록 배정을 담당할 연구자는 연구에는 참여하지 않았으며, 무작위 배정표를 모르는 마취과 의사가 수술 중과 회복실에서의 연구를 시행하였고, 수술 전 가온과 연구는 배정 군을 아는 한 명의 연구 간호사가 시행하였다.

## 일반 시험절차

모든 환자들은 수술 전일 방문 시에 열 쾌적 지수의 표현(100-mm visual analog scale: 0 mm = 상상할 수 있는 가장 추운 상태, 50 mm = 쾌적한 상태, 100 mm = 상상할 수 있는 가장 더운 상태)에 대해 교육을 받았다.

수술 당일 환자는 수술 시작 약 30분 전에 병실에서 정맥로를 확보한 후 실온에서 보관된 수액을 투여받기 시작하였으며, 수술 시작 약 10분 전에 수술 전 대기공간(회복실과 동일한 공간, 주변 온도: 26 ± 1°C)에 도착하였다. 도착 직후 모든 환자들의 이불 밑에 전신형 전용 포를 덮은 후, 배정된 군에 따라 10분 수술 전 가온 군은 47°C로 설정한 강제적 공기 가온기(Warm Touch™ 6000, Covidien, USA)를 사용하여 10분의 수술 전 가온을 시행하였으며, 대조 군은 강제적 공기 가온을 시행하지 않았다. 모든 환자들은 가온 중 열 쾌적 지수가 60 이상으로 열 불쾌감이 있는 경우 연구자에게 보고하도록 하였으며 이 경우 환자의 열 불쾌감 정도와 중단 의사를 물어 중단하거나 가온 온도(45°C, 40°C)를 조절하도록 하였다. 본 저자들이 사용한 강제적 공기 가온기는 47°C의 가온 온도에서 45분까지 지속되며, 45분이 지나면 환자 안전을 위해 45°C로 감소되도록 식품의약품안전처에 허가되었다.

수술 전 가온이 끝난 후에는 강제적 가온기와 전신 포를 제거한 상태에서 수술실로 이동하였으며, 이 후 배정된 군을 알지 못하는 마취의에 의해 표준 감시를 실시하고 환자의 이불을 덮은

상태에서 1% propofol 2 mg/kg과 rocuronium 0.6 mg/kg을 사용하여 마취 유도를 하였으며, 흡입마취제(sevoflurane 또는 desflurane)와 remifentanyl을 이용하여 마취를 유지하였다. 마취 유도 직후 환자의 수술 부위에 따라 상지형 또는 하지형 전용 포를 덮고 수술의가 수술부위를 준비하였으며, 수술 준비가 끝난 후부터 수술이 마칠 때까지 수술 중 지속적인 가온이 시행되었다. 수술 중 가온 온도는 환자의 비 인두 체온에 따라 36.5°C 미만인 경우에는 45°C로, 36.5°C에서 37.5°C 사이인 경우에는 40°C로 37.5°C 이상인 경우 중단하여 조절하였다. 모든 환자들에게는 수술 중 가온/가습이 되는 호흡회로를 사용하였으며, 강제적 공기 가온기를 이용한 지속적인 가온 이외의 다른 추가의 가온 기구들은 사용되지 않았다. 수술이 끝난 후 pyridostigmine과 glycopyrrolate을 사용하여 근 이완을 반전시켰으며, 환자의 의식이 회복되고 자발호흡이 회복된 후 회복실로 이송하였다. 회복실에 도착한 직후 환자의 체온이 36°C 이하인 경우, 강제적 공기 가온기를 40°C로 설정하여 적극적인 가온을 실시하였다.

## 측정

수술 전일 나이와 성별, 키, 몸무게, 체질량지수, 미국마취과학회 신체등급지수 등의 환자의 인구학적인 자료와 수술 종류를 조사하여 환자를 선별하였다.

환자가 수술 전 대기 장소에 도착한 직후 배정된 군을 알고 있는 한 명의 연구 간호사가 수술 전 가온 전에 고막 체온계(Thermoscan®, infrared tympanic thermometer IRT 4020; Braun, USA)를 사용하여 측정된 체온을 기록하였으며[17], 수술 전 가온이 끝난 후에는 고막 체온과 함께 열 패적 지수를 조사하여 기록하였다.

수술 방에 도착하여 수술 방 주변 온도가 기록되었고, 환자의 기도 확보 직후 수술 중 심부 체온을 측정하기 위하여 비공에서 9-10 cm 깊이로 비인두에 체온계(ETP1040, Ewha Biomedics, Korea)를 거치하여 비인두 체온을 측정하였으며[18], 비인두 체온계 거치 시기를 0분으로 정의하고 수술이 끝날 때까지 15분 간격으로 기록하였다. 수술이 끝난 후 마취 시간, 수술 방 도착 후부터 수술 중 지속적인 가온이 다시 시작될 때까지의 시간과 퇴실 시의 수술 방의 온도를 기록하였다. 회복실에 도착 직후부터는 10분 간격으로 고막 체온과 열 패적 지수, 3점 척도(0 = no shivering; 1 = intermittent, low intensity; 2 = moderate shivering; 3 = continuous intense shivering)를 이용한 수술 후 떨림 척도를 측정하여 기록하였다.

본 연구의 주요 결과는 수술 중 후 체온이 36.0°C 미만으로 정의되는 저체온의 빈도이며, 이차 결과는 수술 중 후 체온변화와 수술 전 가온으로 인한 열 패적 지수, 수술 후 회복실에서의 떨림 척도와 열 패적 지수이다.

## 통계 분석

Horn 등[11]은 수술 중 가온이 필요한 수술 중 저체온의 빈도가 수술 전 10분의 가온을 실시한 군에서 31%, 대조군에서는 67%의 저체온이 발생하였다고 보고하였다. 따라서, 본 저자들은 본 연구의 10분의 수술 전 가온이 비슷한 비율로 저체온을 감소시킨다고 가정하였고 유의수준 0.05, 검정력 80%, 탈락율 10%를 고려하여, 각 군의 연구 대상자 수는 30명씩으로 계산되었다. 본 연구의 통계적 분석은 SPSS version 25 (IBM Co., USA)를 이용하여 범주형 변수는 카이-제곱 검정(chi-square analysis) 또는 피셔의 정확도 검정(Fisher's exact test)를 시행하고 연속형 변수는 정규성 검정(Kolmogorov-Smirnov test)시행 후 정규성을 만족하는 변수는 *t*-검정(Student's *t*-test)을 실시하고 만족하지 않은 경우는 Mann-Whitney 검사를 통해 통계분석을 하였다. 수술 전, 중, 후의 체온 변화는 1차 자기회귀(first-order autoregressive) 공분산 구조를 사용한 mixed effect model를 통해 통계분석을 하였으며, 그래프로 그려졌다. Mixed effect model에서 체온의 시간에 따른 두 군간 차이가 유의한 경우에는 Bonferroni 방식을 이용하여 사후 분석을 시행하였다. 모든 연속형 변수는 평균 ± 표준편차 또는 중앙값과 사분위간 범위(1Q, 3Q)로 표기하였으며, 모든 범주형 변수는 백분율과 함께 빈도를 표기하였고, 통계적 유의성은  $P < 0.05$ 로 결정하였다.

## 결과

67명의 환자들이 선별되었고 이 중 3명의 환자가 포함 기준에 위배되어 제외되었으며, 4명의 환자가 참여를 거부하여 제외되어 60명의 환자가 최종적으로 포함되어 수술 전 가온 군( $n = 30$ )과 대조 군( $n = 30$ ) 두 군으로 무작위 배정되었다. 이 중 10분 수술 전 가온 군 중에서 1명은 마취의 실수로 수술 중 가온이 시행되지 않았으며, 1명은 수술의 거부로 인해 수술 중 가온이 중간에 중단되어 탈락되었고, 대조 군 중에서 1명은 수술이 수술 직전 취소되었고, 1명은 수술 전 가온 직전 체온이 높게 ( $>38^{\circ}\text{C}$ ) 측정되어 탈락되어 최종적으로 56명의 환자(수술 전 가온 군 28명, 대조 군 28명)들에게서 자료가 수집되고 분석되었다(Fig. 1).

두 군간의 나이, 성별, 몸무게, 키, 체질량지수, 미국마취과학회 신체등급지수, 수술 종류와 마취 시간, 수술 방 도착 후부터 수술 중 지속적인 가온이 다시 시작될 때까지의 기간(duration of unwarming), 수술 전 대기 장소 도착 시 체온(initial body temperature)과 수술 방 주변 온도는 통계적으로 유의한 차이를 보이지 않았다(Table 1).

수술 중 저체온의 빈도는 두 군간 통계적인 차이를 보이지 않았다(10.7% vs. 28.6%; Differences [95% confidence interval, 95% CI] = -17.9% [-3.4% to 39.6%];  $\phi$  [95% CI] = -0.225 [-0.454 to 0.038];  $P = 0.177$ ). 그러나 첫 1시간 이내에 발생한 수술 중 저체온의 빈도는 10분으로 수술 전 가온 군에

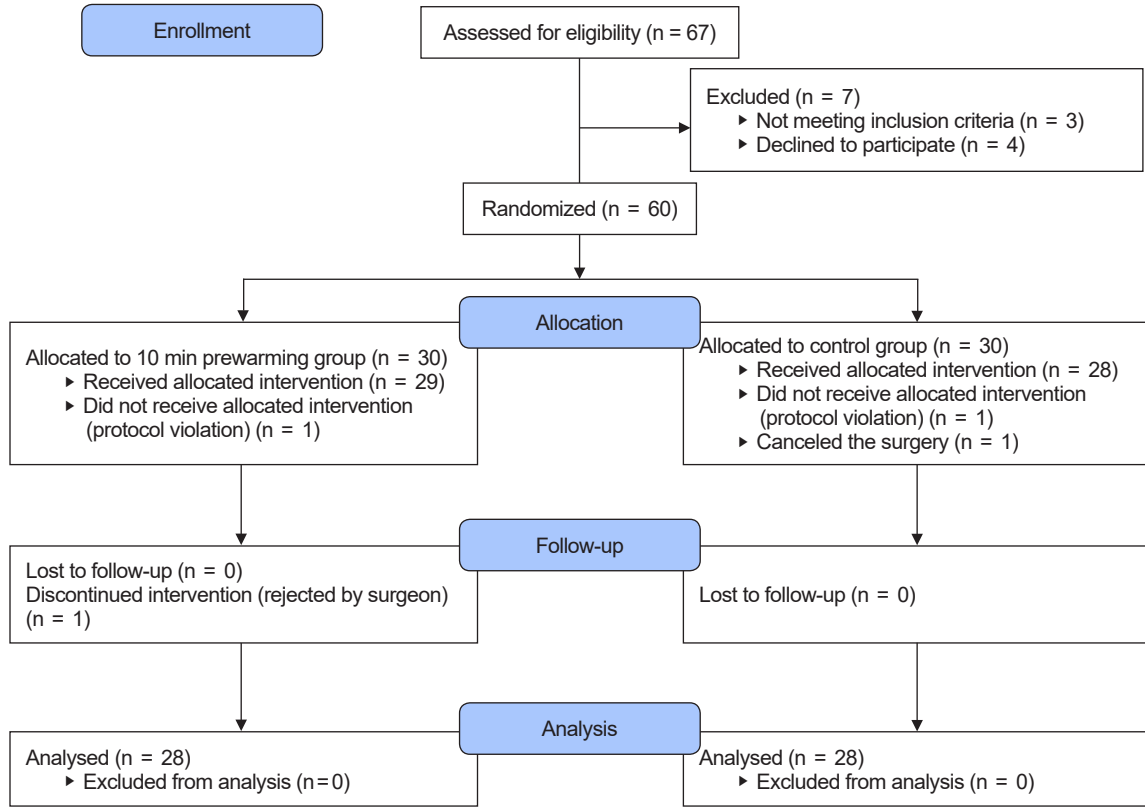

Fig. 1. CONSORT diagram.

Table 1. Patient Characteristics

| Variable                      | 10-min pre-warming group (n = 28) | Control group (n = 28) | P value |
|-------------------------------|-----------------------------------|------------------------|---------|
| Age (yr)                      | 48.04 ± 17.42                     | 49.14 ± 14.31          | 0.796   |
| Sex (M/F)                     | 11/27                             | 10/18                  | 1.000   |
| Weight (kg)                   | 63.51 ± 10.89                     | 61.51 ± 9.09           | 0.460   |
| Height (cm)                   | 163.51 ± 10.26                    | 163.67 ± 9.87          | 0.953   |
| BMI (kg/m <sup>2</sup> )      | 23.74 ± 3.38                      | 23.00 ± 3.28           | 0.413   |
| ASA classification (1/2/3)    | 14/11/3                           | 14/12/2                | 1.000   |
| Surgery type                  |                                   |                        | 0.934   |
| Laparoscopic surgery          | 14 (50.0)                         | 11 (39.3)              |         |
| Minor abdominal surgery       | 0 (0)                             | 1 (3.6)                |         |
| Orthopedic surgery            | 10 (35.7)                         | 12 (42.9)              |         |
| Head and neck surgery         | 2 (7.1)                           | 2 (7.1)                |         |
| Breast surgery                | 2 (7.1)                           | 2 (7.1)                |         |
| Duration of anesthesia (min)  | 103 (86, 147)                     | 90 (75, 143)           | 0.161   |
| Duration of unwarming (min)   | 24 (20, 29)                       | 25 (21, 35)            | 0.248   |
| Initial body temperature (°C) | 36.99 ± 0.33                      | 37.06 ± 0.35           | 0.437   |
| OR temperature (°C)           | 21.63 ± 0.88                      | 21.66 ± 1.21           | 0.910   |

Values are presented as mean ± SD, number (%) or median (1Q, 3Q). Minor abdominal surgery was open peritoneal biopsy performed after conversion from scheduled laparoscopic biopsy. BMI: body mass index, ASA: American Society of Anesthesiologists, OR: operating room.

서 대조 군에 비해 통계적으로 유의하게 적게 나타났으며 그 효과 크기는 크게 나타났다(F = 2, Cramer's V [95% CI] = 0.378 [0.187 to 0.542]; P = 0.013). 수술 후 회복실에서의 저

체온의 빈도와 수술 후 떨림 척도는 두 군간 통계적인 차이를 보이지 않았다(P = 1.000 and P = 0.491) (Table 2). 본 연구에 참여한 모든 연구 대상자의 주 술기 저체온은 35.0°C와 36.0°C



사이의 정도의 저체온을 나타냈다.

시간에 따른 체온의 변화 양상은 두 군에서 유의한 차이를 보였으며( $P = 0.003$ ), 그 차이는 마취 유도 120분의 시점을 제외하고 15분 후부터 회복이 끝날 시점까지 수술 전 가온 군에서 유의하게 높은 체온을 나타냈다( $P < 0.05$ ) (Table 3, Fig. 2).

수술 전 가온기간 동안 열 쾌적 지수는 10분 수술 전 가온 군에서 유의하게 높은 것으로 나타났다( $P < 0.001$ ). 그러나 10분 수술 전 가온 군 대부분 환자들은 수술 전 가온이 끝날 즈음에 가장 높은 열 쾌적 지수를 호소하였으며, 수술 전 가온을 중단하기를 원치 않아 모든 환자에서  $47^{\circ}\text{C}$ , 10분의 수술 전 가온이 조절 없이 시행되었다. 수술 후 회복실에서의 열 쾌적 지수는 두 군간 통계적 차이를 보이지 않았다( $P > 0.05$ ) (Table 4).

모든 환자에서 피부 증상이나 화상 등의 강제적 공기 가온으로 인한 부작용은 보이지 않았다.

## 고찰

주술기 저체온 예방에 관한 여러 지침들에서는 30분 이상의 수술 전 가온을 추천하고 있다[8,9]. 그러나 적절한 수술 전 가온 기간에 관한 연구는 제한적이다. Sessler 등[7]은 30분에서 1시간의 시간이 적절하다고 보고하였으나, 이 연구에서는  $21^{\circ}\text{C}$ 의 환경에서 2시간의 노출 후에 수술 전 가온이 시행되어서 실제 임상과는 다른 상황으로,  $21^{\circ}\text{C}$ 의 2시간의 노출이 없는 임상 상황에서는 30분보다 짧은 시간의 수술 전 가온도 충분할 가능성이 있다[7].

더 높은 온도를 사용한 수술 전 가온은 더 효과적으로 수술 전 가온기간을 줄일 수 있을 것으로 가정할 수 있다[7,19]. Sessler 등[7]의 연구에서도 더 높은 온도를 사용한 수술 전 가온은 비록 첫 40분 동안 말초의 열 함유량은 차이가 나지 않으나 더 많은

**Table 2.** Perioperative Hypothermia

| Variable                                             | 10-min pre-warming group (n = 28) | Control group (n = 28) | Differences (95% CI)    | Effect size (95% CI)     | P value |
|------------------------------------------------------|-----------------------------------|------------------------|-------------------------|--------------------------|---------|
| Intraoperative hypothermia (< $36^{\circ}\text{C}$ ) | 3 (10.7)                          | 8 (28.6)               | -17.9% (-3.4% to 39.6%) | -0.225 (-0.454 to 0.038) | 0.177   |
| Onset of intraoperative hypothermia                  |                                   |                        |                         | 0.378 (0.187 to 0.542)   | 0.013   |
| Normothermia                                         | 25 (89.3)                         | 20 (71.4)              |                         |                          |         |
| Within 1 h                                           | 1 (3.6)                           | 8 (28.6)               |                         |                          |         |
| After 1 h                                            | 2 (7.1)                           | 0 (0)                  |                         |                          |         |
| PACU hypothermia (< $36^{\circ}\text{C}$ )           | 3 (10.7)                          | 3 (10.7)               | 0% (-18.5% to 18.5%)    | 0.000 (-0.272 to 0.258)  | 1.000   |
| Shivering grade                                      |                                   |                        |                         | 0.192 (0.117 to 0.345)   | 0.491   |
| Grade 0                                              | 26 (92.9)                         | 28 (100.0)             |                         |                          |         |
| Grade 1                                              | 1 (3.6)                           | 0 (0)                  |                         |                          |         |
| Grade 2                                              | 1 (3.6)                           | 0 (0)                  |                         |                          |         |

Values are presented as the number (%). All cases of perioperative hypothermia were mild, falling between  $35.0^{\circ}\text{C}$  and  $36.0^{\circ}\text{C}$ . CI: confidence interval, PACU: post-anesthesia care unit. Effect sizes of the chi-squared test are phi or Cramer's V as appropriate. P value by Fisher's exact test.

**Table 3.** Mean Perioperative Body Temperature ( $^{\circ}\text{C}$ ) and Mean Difference between Groups

| Time          | 10-min pre-warming group |        | Control group    |        | Mean difference between groups (95% CI) | P value |
|---------------|--------------------------|--------|------------------|--------|-----------------------------------------|---------|
|               | Body temperature         | Number | Body temperature | Number |                                         |         |
| Baseline      | $37.0 \pm 0.33$          | 28     | $37.1 \pm 0.35$  | 28     | -0.071 (-0.290 to 0.147)                | 0.519   |
| Pre-induction | $37.1 \pm 0.31$          | 28     | $37.1 \pm 0.34$  | 28     | 0.007 (-0.147 to 0.290)                 | 0.948   |
| 0 min         | $36.6 \pm 0.34$          | 28     | $36.4 \pm 0.39$  | 28     | 0.214 (-0.004 to 0.433)                 | 0.055   |
| 15 min        | $36.6 \pm 0.37$          | 28     | $36.3 \pm 0.38$  | 28     | 0.254 (0.035 to 0.472)                  | 0.023   |
| 30 min        | $36.5 \pm 0.42$          | 28     | $36.3 \pm 0.40$  | 27     | 0.233 (0.014 to 0.452)                  | 0.038   |
| 45 min        | $36.6 \pm 0.44$          | 25     | $36.3 \pm 0.41$  | 25     | 0.248 (0.025 to 0.472)                  | 0.029   |
| 60 min        | $36.6 \pm 0.46$          | 24     | $36.3 \pm 0.41$  | 23     | 0.286 (0.060 to 0.512)                  | 0.014   |
| 75 min        | $36.6 \pm 0.50$          | 18     | $36.2 \pm 0.37$  | 15     | 0.340 (0.096 to 0.584)                  | 0.007   |
| 90 min        | $36.5 \pm 0.41$          | 15     | $36.2 \pm 0.37$  | 9      | 0.318 (0.050 to 0.587)                  | 0.020   |
| 105 min       | $36.6 \pm 0.47$          | 11     | $36.3 \pm 0.34$  | 9      | 0.324 (0.045 to 0.603)                  | 0.023   |
| 120 min       | $36.4 \pm 0.61$          | 7      | $36.2 \pm 0.33$  | 6      | 0.286 (-0.033 to 0.606)                 | 0.079   |
| PACU arrival  | $36.7 \pm 0.54$          | 28     | $36.5 \pm 0.43$  | 28     | 0.229 (0.010 to 0.447)                  | 0.041   |
| PACU 10 min   | $36.8 \pm 0.48$          | 28     | $36.5 \pm 0.50$  | 28     | 0.332 (0.114 to 0.551)                  | 0.003   |
| PACU 20 min   | $36.8 \pm 0.42$          | 28     | $36.5 \pm 0.41$  | 28     | 0.264 (0.046 to 0.483)                  | 0.018   |
| PACU 30 min   | $36.8 \pm 0.47$          | 28     | $36.5 \pm 0.41$  | 28     | 0.289 (0.071 to 0.508)                  | 0.010   |

Values are presented as mean  $\pm$  SD. CI: confidence interval, PACU: post-anesthesia care unit. P values in group  $\times$  time comparison between groups (10-min pre-warming group-control group) using the mixed-effect model with the post-hoc Bonferroni test.

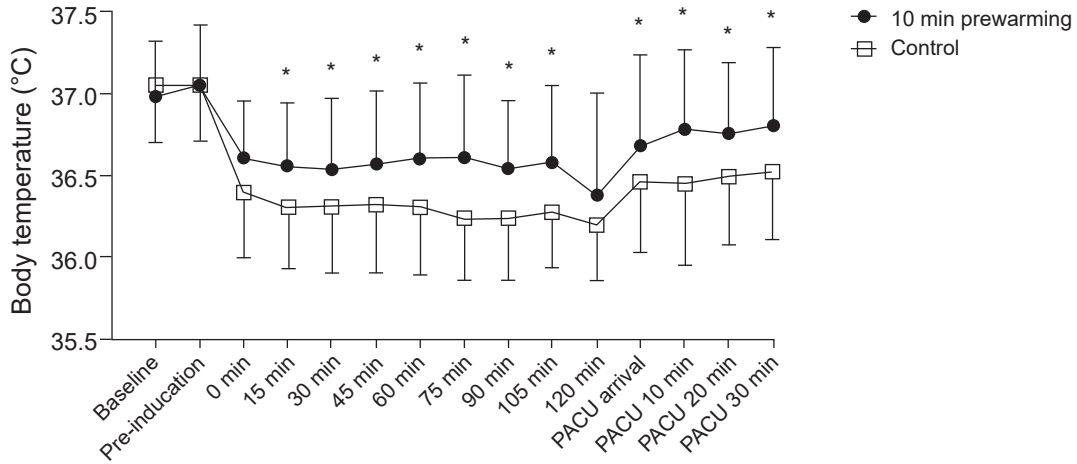

**Fig. 2.** Perioperative body temperature. Preoperative and postoperative core temperatures of the patients were measured using a tympanic membrane thermometer. Intraoperative core temperature was recorded every 15 min after anesthetic induction using a nasopharyngeal probe. The temperature was higher in the 10-min pre-warming group from 15 min after anesthetic induction to the post-anesthesia care unit (PACU) area. Error bars indicate  $\pm 1$  SD of temperature at each time. Baseline: immediately after arrival in the preoperative area, Pre-induction: immediately after the end of warming, Intraoperative 0 min: immediately after nasopharyngeal probe insertion, PACU arrival: immediately after arrival at the PACU, PACU 10, 20, 30 min: 10, 20, and 30 min after arrival at the PACU. \*P < 0.05 based on post-hoc testing using Bonferroni's method.

**Table 4.** Thermal Comfort Scale

| Thermal comfort scale               | 10-min pre-warming group (n = 28) | Control group (n = 28) | P value |
|-------------------------------------|-----------------------------------|------------------------|---------|
| Preoperative thermal comfort scale  |                                   |                        |         |
| Before pre-warming                  | 50 (40, 50)                       | 50 (50, 50)            | 0.558   |
| After pre-warming                   | 70 (50, 78)                       | 50 (46, 50)            | < 0.001 |
| Postoperative thermal comfort scale |                                   |                        |         |
| 10 min                              | 50 (40, 50)                       | 50 (40, 50)            | 0.493   |
| 20 min                              | 50 (40, 60)                       | 50 (40, 50)            | 0.871   |
| 30 min                              | 50 (40, 60)                       | 50 (45, 50)            | 0.961   |

Values are presented as median (1Q, 3Q).

말초 혈관 확장과 중심부로의 더 많은 열 전달을 야기한다고 보고하였다. 이에 본 저자들이 사용한 47°C의 온도는 이전 연구에서 심각한 열 불편감 없이 효과적으로 사용되었으며, 말초에서 중심부로의 더 많은 열 전달을 가져왔을 것으로 추정된다[12].

최근 여러 연구에서도 30분 이내의 수술 전 가온의 효과를 보고하고 있다. Horn 등[20]은 경막 외 마취 환자들에게 15분의 수술 전 가온이 효과적으로 체온을 증가시켰다고 보고하였으며 (37.1  $\pm$  0.4°C vs. 36.0  $\pm$  0.5°C), 같은 저자들의 다른 연구에서는 경막 외 마취와 전신마취를 함께 시행 받는 환자들에게서 경막 외 마취 후 전신마취 시행 사이의 15분의 수술 전 가온을 통해 효과적으로 주 술기 저체온을 감소시켰다고 보고하였다 (72% vs. 6%) [21]. Shin 등[22]은 또한 상완 신경총 마취와 전신마취를 함께 시행 받는 환자들에게서 상박 신경총 마취를 시행 받는 기간 약 14분 동안 시행된 수술 전 가온이 효과적으로 주 술기 저체온을 감소시켰다고 보고하였다(96.2% vs. 57.7%). 그러나 이 연구들은 부위 마취를 함께 시행한 연구들로 부위마취 시 야기되는 추가의 말초혈관 확장의 효과를 배제할 수 없다.

Horn 등[11]은 120분 이내의 전신마취를 시행 받는 환자에게

게 10분의 수술 전 가온이 효과적으로 주 술기 저체온을 감소시켰다고 보고하였다. 또한, 본 저자들의 이전 연구에서도 10분의 수술 전 가온이 30분의 수술 전 가온과 비슷한 저체온 감소 효과를 보였다[12]. 그러나 이 두 연구는 수술 중 저체온이 발생한 경우에만 수술 중 가온을 시행한 연구로 수술 중 지속적인 가온을 시행 받는 환자들에게 같은 효과를 기대할 수 없다.

수술 중 지속적인 가온을 시행 받는 환자들에게의 수술 전 가온의 효과는 다양하게 보고되고 있다. 그러나 최근 복강경의 사용과 외래 마취의 증가 등 시간에 따라 바뀐 의료환경의 영향으로 수술 중 체온 저하 비율이 감소되어 그 효과는 아직 논란의 여지가 있다[13]. 여러 이전 연구들에서는 수술 전 가온이 지속적인 가온을 시행 받는 환자들에게 효과적으로 저체온 발생을 줄였다고 하였으나[14-16], Akhtar 등[13]은 60분의 43°C의 수술 전 가온이 효과적인 저체온 발생 감소를 보이지 않는다고 하였으며 이는 대조 군에서 수동적 가온이 효과적으로 시행되었기 때문일 수 있다고 하였다.

본 연구 결과, 이전 Akhtar 등[13]의 연구와 연속적으로 47°C, 10분 수술 전 가온 군과 대조 군간의 주 술기 저체온 빈도의 차

이가 유의하지 않았다. 그 이유로 첫 번째, 본 연구에서 전신 포와 환자의 이불을 이중으로 덮어 대조 군에서도 수동적인 가온이 효과적으로 시행되었을 것으로 추정해 볼 수 있다. 두 번째, 수술 전 가온이 실시된 장소의 온도가 높은 점도 하나의 요인으로 추정해 볼 수 있다. 본 연구에서는 연구가 시행된 기관 규정에 따라 수술 전 가온이 시행된 장소(수술 후 회복실과 같은 장소)의 주변 온도가  $26 \pm 1^\circ\text{C}$ 로 유지되었다. 이는 이전 연구들보다 높은 온도로, Giesbrecht 등[23]은 주변 온도가 높을수록 열 소실이 감소한다고 보고한 바 있다.

전체적인 주 술기 저체온의 빈도와 다르게, 사후 검정으로 본 첫 1시간 이내에 발생한 수술 중 저체온의 빈도는 10분 수술 전 가온 군에서 대조 군에 비해 통계적으로 유의하게 적게 나타났다. 이는 수술 전 가온의 효과가 수술 첫 1시간 이내 두드러지게 나타남을 확인할 수 있는 결과이다[6].

본 연구에서 수술 중 후의 시간에 따른 두 군의 온도 차이는 마취 유도 15분 이후부터 수술 후 회복까지 그 차이가 영국 국립 보건원(National Institute for Health and Clinical Excellence, NICE)에서 정의한 저체온 환자의 가온 효과에 대한 임상적인 온도 차이인  $0.2^\circ\text{C}$  이상 유지되는 결과를 보였으며[24], 이는 통계적으로도 유의하였다. 그러나 마취 유도 후 120분에는 통계적 차이를 보이지 않았는데 이는 수술이 120분보다 짧은 수술을 대상으로 하였기 때문에 마취 유도 120분 시점에 남아있는 표본 수가 적었기 때문으로 추정해볼 수 있다(Table 3). 본 연구의 회복 시까지 지속되는 두 군의 온도차이 결과는 수술 전 가온의 효과가 수술 중 가온의 효과에 추가적인 효과를 가지고 있을 가능성을 추정해 볼 수 있다. 이는 이전 연구들에서 수술 중 가온을 시행하지 않았던 경우 온도 차이가 점차 감소하는데 반하여 [11,12], 수술 중 가온과 수술 전 가온을 함께 시행 받는 경우 온도 차이가 지속적으로 나타나는 양상을 보였던 결과들과 일치한다[14-16,22].

Sessler 등[7]은  $40^\circ\text{C}$ 와  $43^\circ\text{C}$ 의 수술 전 가온을 시행하는 경우 1시간 이후에 열 불편감과 발한을 호소한다고 보고하였다. 그러나 본 연구는  $47^\circ\text{C}$ 의 높은 온도로 수술 전 가온이 시행되었기 때문에 빠른 시기에 열 불편감을 호소할 가능성이 높을 것으로 생각되었으며, 본 연구 결과 열 쾌적 지수는 수술 전 가온 군에서 대조 군에 비해 높게 측정되었다. 그러나 높은 열 쾌적 지수를 호소할 대부분의 환자들은 10분이 가까워질 무렵 높은 열 쾌적 지수를 호소하기 시작하였으며, 유지 가능한 범위로 가온을 중단하기를 원치 않아 연구는 계획대로 완료되었다.

이 연구는 여러 제한점을 갖는다. 첫째, 본 연구의 연구 대상 수가 상대적으로 적어 검정력이 작았을 가능성이 있다. 본 연구의 대상 수는 Horn 등[11]의 연구에 기반하여 계산되었는데, 본 연구는 Horn 등[11]의 연구와 달리 수술 중 지속적인 가온을 실시하고, 수술 전 가온의 온도를  $47^\circ\text{C}$ 로 높게 유지한 등의 다른 연구 설계를 갖고 있어 전반적인 저체온 발생 빈도를 낮추어 검정력이 작았을 것으로 추정된다. 후에 더 큰 표본 수를 통한 추가의 연구가 필요할 것으로 생각된다. 둘째, 본 연구는 120분 이내

의 짧은 수술을 대상으로 하였기 때문에 120분 이상의 주 수술을 시행 받는 환자들에게 적용할 수 없다. 후에 주 수술을 시행 받는 환자들을 대상으로 하는 연구가 필요할 것으로 생각된다. 셋째, 본 연구에서 측정되지 않은 환자들의 수술 중 출혈량과 상온으로 투여된 수액량이 본 연구의 결과인 체온에 영향을 미칠 수 있다. 그러나 본 연구는 120분 이내의 짧은 수술을 대상으로 하여 수술 중 출혈과 수액량이 매우 제한적이었으므로 이에 대한 영향은 적을 것으로 추정된다. 넷째, 이 연구에서는 말초 온도와 열 함유량 등을 측정하지 않았기 때문에 추정할 수 밖에 없다. 그러나 중심 체온이 주 술기 저체온과 저체온으로 인한 효과를 판단하는 중요한 지표이므로 이로 충분할 것으로 생각된다.

결과적으로  $47^\circ\text{C}$ 의 온도를 이용한 수술 전 10분의 가온은 수술 중 지속적인 가온을 시행 받는 120분 이내의 전신마취 환자에게 주술 기 저체온 감소를 위한 추가의 이득은 보이지 않았다. 그러나 수술 중 체온은 수술 전 가온을 시행했을 경우 대조군에 비해 높게 유지되었다. 수술 중 적극적이고 지속적인 가온으로 인해 대조군에서의 저체온증의 발생률이 기존 연구 결과에서보다 낮았기에, 수술 전 가온의 저체온증 예방 효과는 더 큰 표본수를 통한 추가 연구를 통해 검증이 필요할 것으로 보인다.

## CONFLICTS OF INTEREST

No potential conflict of interest relevant to this article was reported.

## AUTHOR CONTRIBUTIONS

Conceptualization: Jae Hwa Yoo, Si Young Ok. Data acquisition: Sun Young Park, Mun Gyu Kim, Ho Bum Cho, Gyu Wan You. Formal analysis: Jae Hwa Yoo, Sang Ho Kim, Ji Won Chung. Supervision: Si Young Ok. Writing-original draft: Jae Hwa Yoo. Writing-review & editing: Jae Hwa Yoo, Si Young Ok, Sang Ho Kim, Ji Won Chung.

## ORCID

Jae Hwa Yoo, <https://orcid.org/0000-0003-0675-0761>

Si Young Ok, <https://orcid.org/0000-0001-7572-5311>

Sang Ho Kim, <https://orcid.org/0000-0003-3781-5353>

Ji Won Chung, <https://orcid.org/0000-0003-4573-9100>

Sun Young Park, <https://orcid.org/0000-0003-2588-3324>

Mun Gyu Kim, <https://orcid.org/0000-0003-1992-8215>

Ho Bum Cho, <https://orcid.org/0000-0001-9540-1525>

Gyu Wan You, <https://orcid.org/0000-0003-1373-6538>

## REFERENCES

1. Torossian A, Bräuer A, Höcker J, Bein B, Wulf H, Horn EP. Pre-

- venting inadvertent perioperative hypothermia. *Dtsch Arztebl Int* 2015; 112: 166-72.
2. Young VL, Watson ME. Prevention of perioperative hypothermia in plastic surgery. *Aesthet Surg J* 2006; 26: 551-71.
  3. Sessler DI. Perioperative thermoregulation and heat balance. *Lancet* 2016; 387: 2655-64.
  4. Connelly L, Cramer E, DeMott Q, Piperno J, Coyne B, Winfield C, et al. The optimal time and method for surgical prewarming: a comprehensive review of the literature. *J Perianesth Nurs* 2017; 32: 199-209.
  5. Sun Z, Honar H, Sessler DI, Dalton JE, Yang D, Panjasawatwong K, et al. Intraoperative core temperature patterns, transfusion requirement, and hospital duration in patients warmed with forced air. *Anesthesiology* 2015; 122: 276-85.
  6. Matsukawa T, Sessler DI, Sessler AM, Schroeder M, Ozaki M, Kurz A, et al. Heat flow and distribution during induction of general anesthesia. *Anesthesiology* 1995; 82: 662-73.
  7. Sessler DI, Schroeder M, Merrifield B, Matsukawa T, Cheng C. Optimal duration and temperature of prewarming. *Anesthesiology* 1995; 82: 674-81.
  8. Forbes SS, Eskicioglu C, Nathens AB, Fenech DS, Laflamme C, McLean RF, et al. Evidence-based guidelines for prevention of perioperative hypothermia. *J Am Coll Surg* 2009; 209: 492-503. e1.
  9. Horn EP, Klar E, Höcker J, Bräuer A, Bein B, Wulf H, et al. [Prevention of perioperative hypothermia: implementation of the S3 guideline]. *Chirurg* 2017; 88: 422-8. German.
  10. Bräuer A, Waeschle RM, Heise D, Perl T, Hinz J, Quintel M, et al. [Preoperative prewarming as a routine measure. First experiences]. *Anaesthesist* 2010; 59: 842-50. German.
  11. Horn EP, Bein B, Böhm R, Steinfath M, Sahili N, Höcker J. The effect of short time periods of pre-operative warming in the prevention of peri-operative hypothermia. *Anaesthesia* 2012; 67: 612-7.
  12. Yoo JH, Ok SY, Kim SH, Park SY, Han YM, Kim D. The effect of 10 minutes of prewarming for prevention of inadvertent perioperative hypothermia: comparison with 30 minutes of prewarming. *Anesth Pain Med* 2018; 13: 447-53.
  13. Akhtar Z, Hesler BD, Fiffick AN, Mascha EJ, Sessler DI, Kurz A, et al. A randomized trial of prewarming on patient satisfaction and thermal comfort in outpatient surgery. *J Clin Anesth* 2016; 33: 376-85.
  14. Andrzejewski J, Hoyle J, Eapen G, Turnbull D. Effect of prewarming on post-induction core temperature and the incidence of inadvertent perioperative hypothermia in patients undergoing general anaesthesia. *Br J Anaesth* 2008; 101: 627-31.
  15. De Witte JL, Demeyer C, Vandemaele E. Resistive-heating or forced-air warming for the prevention of redistribution hypothermia. *Anesth Analg* 2010; 110: 829-33.
  16. Perl T, Peichl LH, Reyntjens K, Deblaere I, Zaballos JM, Bräuer A. Efficacy of a novel prewarming system in the prevention of perioperative hypothermia. A prospective, randomized, multicenter study. *Minerva Anestesiologica* 2014; 80: 436-43.
  17. Gasim GI, Musa IR, Abdien MT, Adam I. Accuracy of tympanic temperature measurement using an infrared tympanic membrane thermometer. *BMC Res Notes* 2013; 6: 194.
  18. Lee J, Lim H, Son KG, Ko S. Optimal nasopharyngeal temperature probe placement. *Anesth Analg* 2014; 119: 875-9.
  19. Just B, Trévien V, Delva E, Lienhart A. Prevention of intraoperative hypothermia by preoperative skin-surface warming. *Anesthesiology* 1993; 79: 214-8.
  20. Horn EP, Schroeder F, Gottschalk A, Sessler DI, Hiltmeyer N, Standl T, et al. Active warming during cesarean delivery. *Anesth Analg* 2002; 94: 409-14.
  21. Horn EP, Bein B, Broch O, Iden T, Böhm R, Latz SK, et al. Warming before and after epidural block before general anaesthesia for major abdominal surgery prevents perioperative hypothermia: a randomised controlled trial. *Eur J Anaesthesiol* 2016; 33: 334-40.
  22. Shin KS, Lee GY, Chun EH, Kim YJ, Kim WJ. Effect of short-term prewarming on body temperature in arthroscopic shoulder surgery. *Anesth Pain Med* 2017; 12: 388-93.
  23. Giesbrecht GG, Ducharme MB, McGuire JP. Comparison of forced-air patient warming systems for perioperative use. *Anesthesiology* 1994; 80: 671-9.
  24. National Collaborating Centre for Nursing and Supportive Care (UK). The management of inadvertent perioperative hypothermia in adults. London, Royal College of Nursing (UK). 2008.
